# Supplementary material
Source: PubMed Central journal article supplement (PMC2785362)
Supplement: supp_M109.022897_SUPPLEMENTAL_DATA.pdf [file supp_M109.022897_SUPPLEMENTAL_DATA.pdf]

## SUPPLEMENTAL DATA

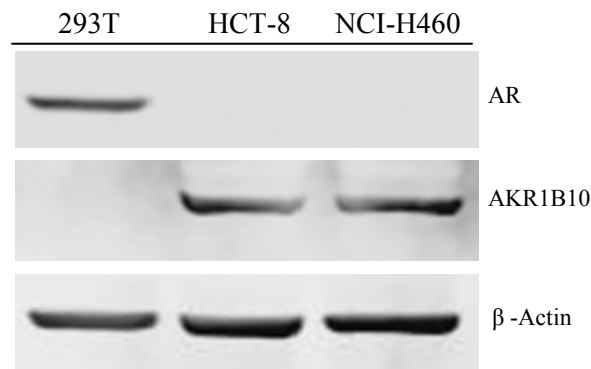

**Figure 1S. AR and AKR1B10 expression.** Aldose reductase (AR) and aldo-keto reductase family 1 member B10 (AKR1B10) are two proteins that are expressed in human tissues. These two proteins show more than 70% of identity of amino acid sequence and overlap of substrates. This figure demonstrates the differential expression of these two proteins in 293T (human embryonic kidney cells), HCT-8 (human colon adenocarcinoma), and NCI-H460 (human lung carcinoma) cells. Soluble proteins (50  $\mu$ g each) were used for Western blot analysis as described in the Materials and Methods. Beta-actin was probed to indicate the relative amounts of loaded proteins.

**A) AKR1B10 protein**

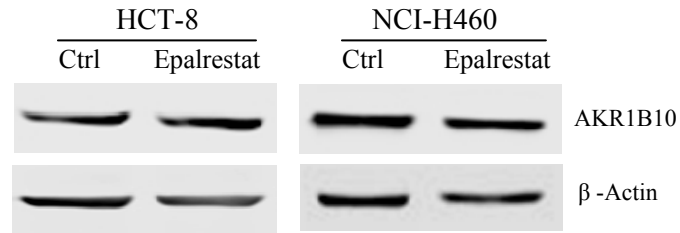

**B) Lipid synthesis**

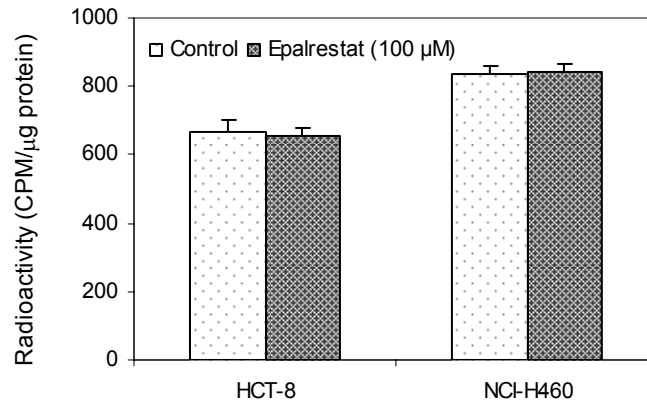

**Figure 2S. Effects of epalrestat on AKR1B10 protein level and lipid synthesis.** HCT-8 (human colon adenocarcinoma) and NCI-H460 (human lung carcinoma) cells were exposed to an AKR1B10 inhibitor, epalrestat (100  $\mu$ M) for 24 hours, and Western blot (A) with 50  $\mu$ g of soluble proteins each and lipid synthesis (B) were performed as described in the Materials and Methods. Beta-actin was probed to indicate the relative amounts of loaded proteins. Data indicate that epalrestat does not affect the AKR1B10 protein levels or lipid synthesis.
